# Supplementary material for: Ambipolar charge-transport property for the D–A complex with naphthalene diimide motif
Source: Royal Society of Chemistry journal article supplement (doi:10.1039/c3tc32377c), 2014-01-01
Supplement: c3tc32377c.pdf [file c3tc32377c.pdf]

## Supporting Information

### Ambipolar charge-transport property for the D-A complex with naphthalene diimide motif

Xin Chen, Guanxin Zhang,<sup>\*</sup> Hwei Luo, Yonghai Li, Zitong Liu, Deqing Zhang<sup>\*</sup>

*CAS Key Laboratory of Organic Solids, Institute of Chemistry, Chinese Academy of Sciences, Beijing 100190, China.*

E-mail: dqzhang@iccas.ac.cn

#### Contents:

|                                                                                                                        |    |
|------------------------------------------------------------------------------------------------------------------------|----|
| 1. TGA analysis of 4NH <sub>2</sub> -NDI .....                                                                         | S2 |
| 2. Absorption spectra of blend thin films of DHNDI and 4NH <sub>2</sub> -NDI .....                                     | S2 |
| 3. DFT calculation data .....                                                                                          | S2 |
| 4. OFET performances of 4NH <sub>2</sub> -NDI, DHNDI, and blend system .....                                           | S3 |
| 5. AFM images of thin films of 4NH <sub>2</sub> -NDI (A) and DHNDI (B) after annealing at different temperatures ..... | S4 |
| 6. <sup>1</sup> H NMR and <sup>13</sup> C NMR spectra of 4NH <sub>2</sub> -NDI and compound 1 .....                    | S4 |

### 1. TGA analysis of 4NH<sub>2</sub>-NDI

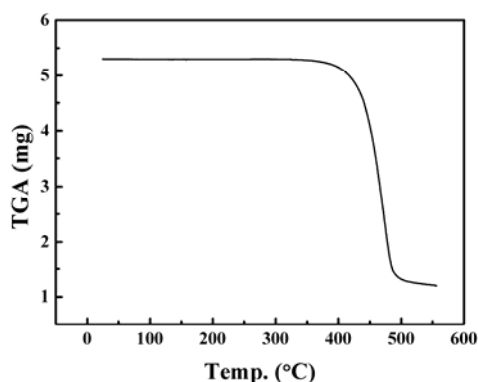

Fig. S1 TGA curves of 4NH<sub>2</sub>-NDI from 25 °C to 550 °C with heating rate of 10 °C/min. under nitrogen atmosphere.

### 2. Absorption spectra of blend thin films of DHNDI and 4NH<sub>2</sub>-NDI

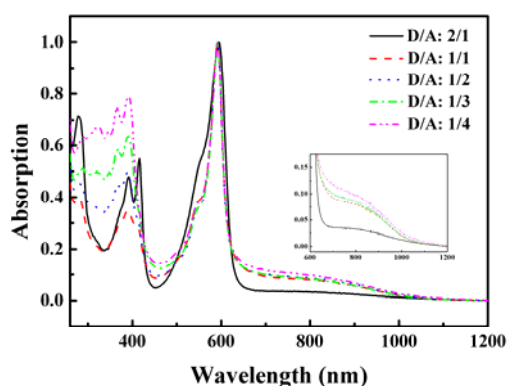

Fig. S2 The absorption spectra of blend thin films of DHNDI and 4NH<sub>2</sub>-NDI in different molar ratios.

### 3. DFT calculation data

#### Calculation data for 4NH<sub>2</sub>-NDI:

|    |   | Coordinates(Angstroms) |           |           |
|----|---|------------------------|-----------|-----------|
|    |   | X                      | Y         | Z         |
| 1  | C | -0.703798              | -2.464147 | -0.001222 |
| 2  | C | 0.736247               | -2.453367 | 0.000762  |
| 3  | C | 1.422077               | -1.229440 | -0.038221 |
| 4  | C | 0.706733               | 0.005211  | -0.028848 |
| 5  | C | -0.706733              | -0.005213 | 0.028847  |
| 6  | C | -1.408058              | -1.249134 | 0.038029  |
| 7  | C | 1.408057               | 1.249132  | -0.038041 |
| 8  | C | 0.703796               | 2.464143  | 0.001211  |
| 9  | C | -0.736244              | 2.453363  | -0.000748 |
| 10 | C | -1.422075              | 1.229438  | 0.038232  |
| 11 | C | -2.888598              | 1.218467  | 0.018888  |
| 12 | N | -3.525614              | -0.023200 | 0.007529  |
| 13 | C | -2.876441              | -1.262819 | 0.019716  |
| 14 | C | 2.888599               | -1.218467 | -0.018851 |

|    |   |           |           |           |
|----|---|-----------|-----------|-----------|
| 15 | N | 3.525615  | 0.023201  | -0.007534 |
| 16 | C | 2.876440  | 1.262818  | -0.019756 |
| 17 | N | -1.307921 | -3.698781 | -0.001336 |
| 18 | N | 1.362765  | -3.677581 | -0.000827 |
| 19 | N | 1.307916  | 3.698781  | 0.001285  |
| 20 | N | -1.362760 | 3.677582  | 0.000883  |
| 21 | O | -3.554325 | -2.298335 | 0.010155  |
| 22 | O | 3.594471  | -2.235402 | -0.007346 |
| 23 | O | -3.594465 | 2.235404  | 0.007342  |
| 24 | O | 3.554319  | 2.298337  | -0.010148 |
| 25 | C | -4.993606 | 0.003608  | -0.014608 |
| 26 | C | 4.993606  | -0.003607 | 0.014604  |
| 27 | H | -2.320510 | -3.656002 | -0.088043 |
| 28 | H | -0.834626 | -4.405182 | -0.550155 |
| 29 | H | 0.906275  | -4.390963 | 0.553327  |
| 30 | H | 2.374865  | -3.614607 | 0.084459  |
| 31 | H | 2.320508  | 3.656004  | 0.087978  |
| 32 | H | 0.834633  | 4.405195  | 0.550100  |
| 33 | H | -0.906285 | 4.390976  | -0.553268 |
| 34 | H | -2.374863 | 3.614609  | -0.084388 |
| 35 | H | -5.344232 | -1.023893 | 0.012588  |
| 36 | H | -5.340671 | 0.504922  | -0.920442 |
| 37 | H | -5.363030 | 0.563106  | 0.846638  |
| 38 | H | 5.344233  | 1.023892  | -0.012656 |
| 39 | H | 5.340673  | -0.504863 | 0.920470  |
| 40 | H | 5.363028  | -0.563160 | -0.846606 |

Total energy: -1247.71569169 Hartrees

#### 4. OFET performances of 4NH<sub>2</sub>-NDI, DHNDI, and blend system with D/A molar ratio of 1:3

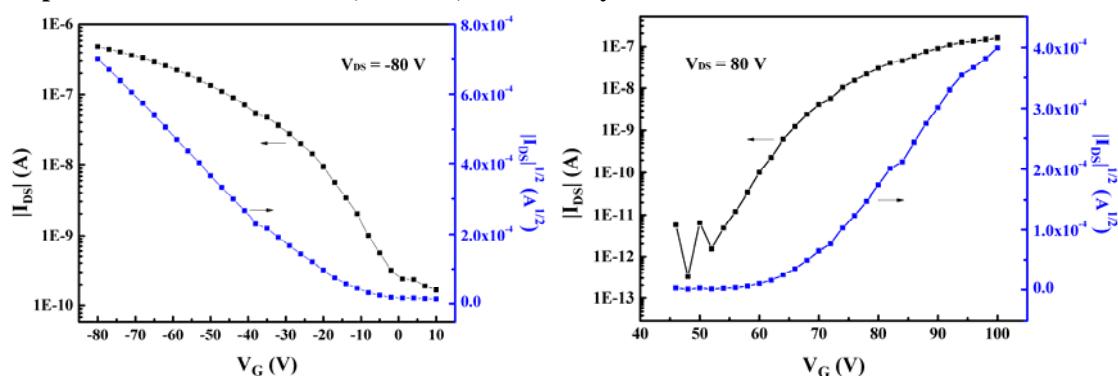

Fig. S3 Transfer characteristics for OFETs of 4NH<sub>2</sub>-NDI (left, measured in air) and DHNDI (right, measure in N<sub>2</sub>); the channel width ( $W$ ) and length ( $L$ ) were 1440  $\mu\text{m}$  and 50  $\mu\text{m}$ , respectively.

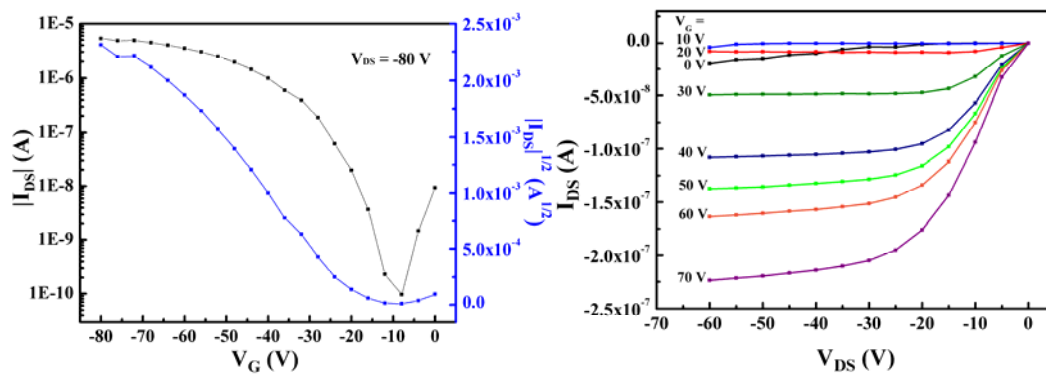

Fig. S4 Transfer (*left*) and output (*right*) characteristics for OFETs of blend system with D/A molar ratio of 1:3 measured in air; the channel width ( $W$ ) and length ( $L$ ) were 1440  $\mu\text{m}$  and 50  $\mu\text{m}$ , respectively.

**5. AFM images of thin films of 4NH<sub>2</sub>-NDI (A) and DHNDI (B) after annealing at different temperatures**

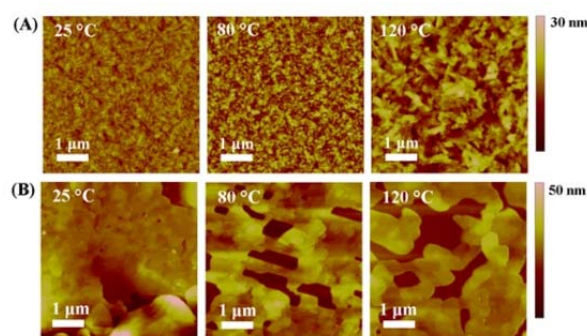

Fig. S5 AFM images of thin films of 4NH<sub>2</sub>-NDI (A) and DHNDI (B) after annealing at different temperatures.

**6. <sup>1</sup>H NMR and <sup>13</sup>C NMR spectra of 4NH<sub>2</sub>-NDI and compound 1**

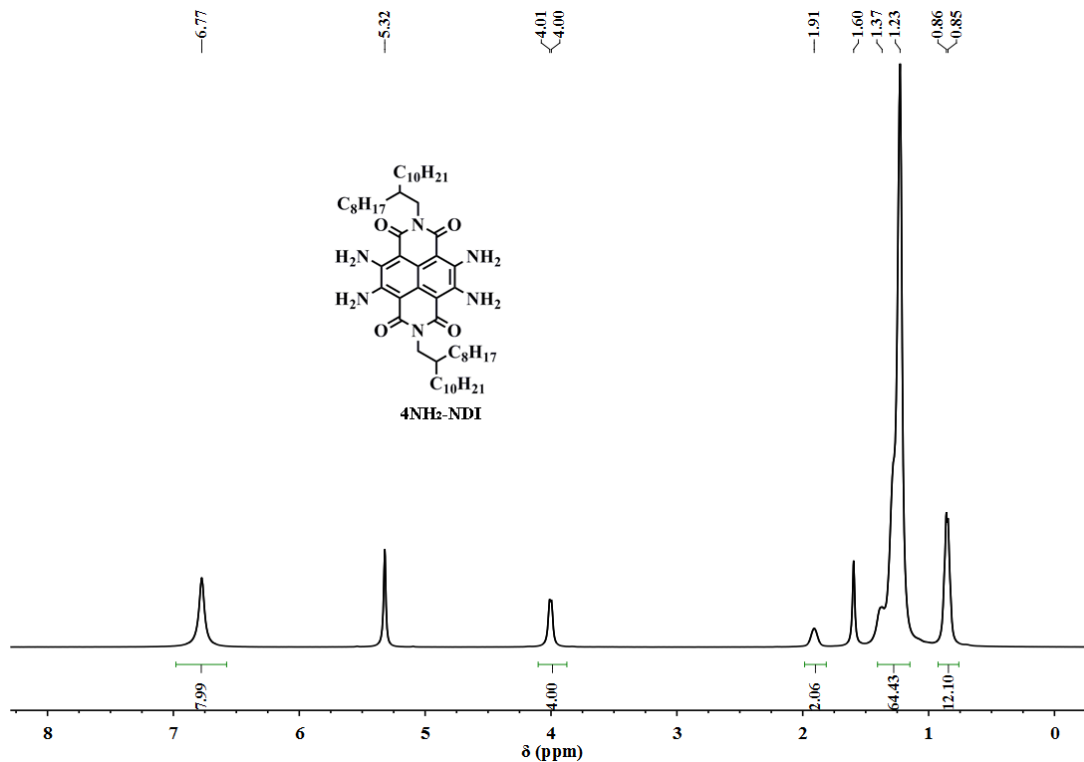

Fig. S6 <sup>1</sup>H NMR spectra of 4NH<sub>2</sub>-NDI

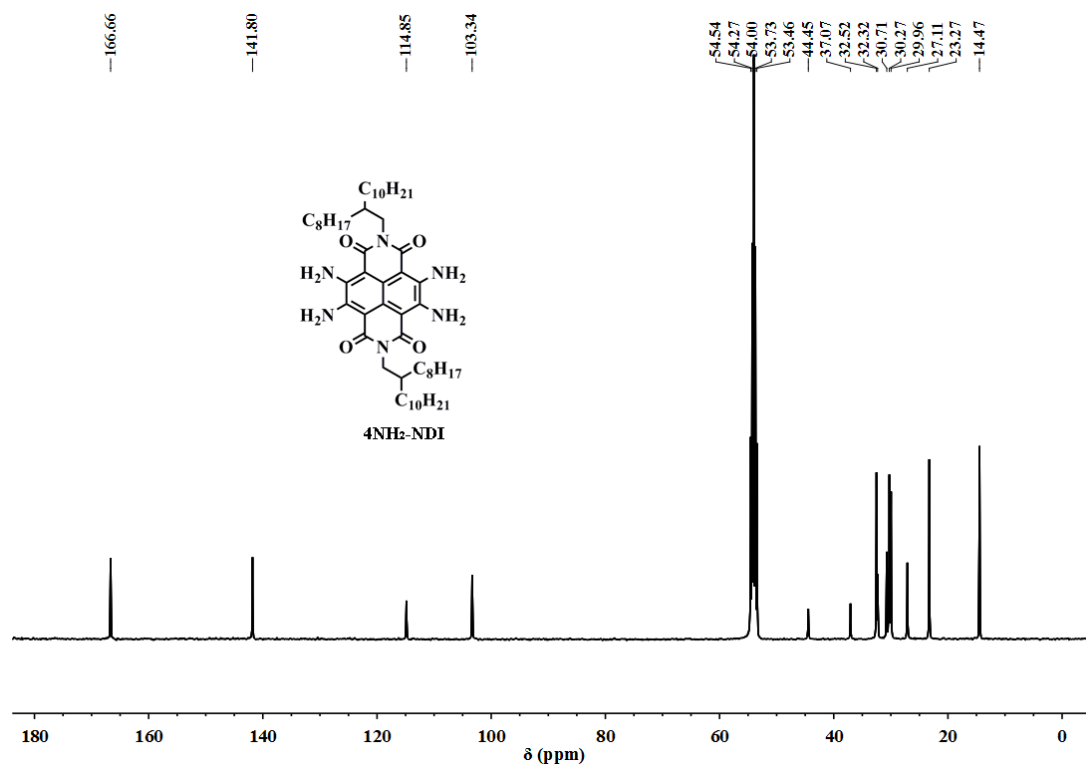

Fig. S7 <sup>13</sup>C NMR spectra of 4NH<sub>2</sub>-NDI

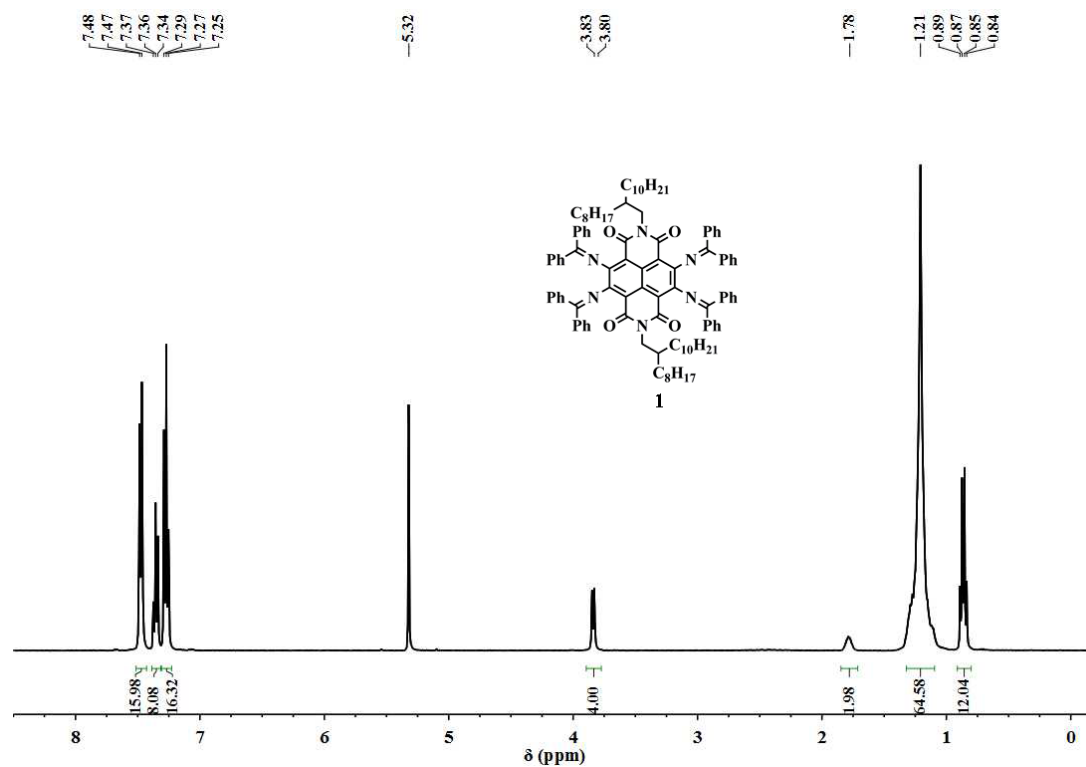

Fig. S8 <sup>1</sup>H NMR spectra of 1

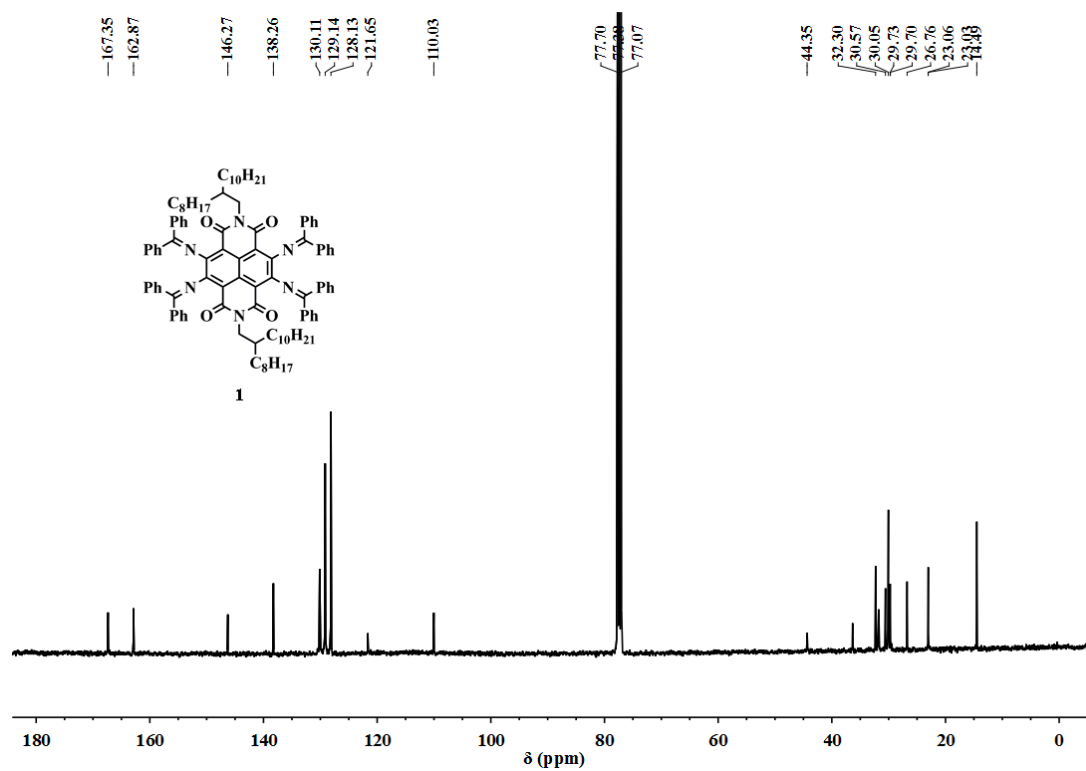

Fig. S9 <sup>13</sup>C NMR spectra of **1**
